# The importance of vaccinated individuals to population-level evolution of pathogens

Maria A. Gutierrez<sup>a,\*</sup> , Julia R. Gog<sup>a,b,†</sup> 

<sup>a</sup>Department of Applied Mathematics and Theoretical Physics, University of Cambridge

<sup>b</sup>JUNIPER – Joint UNiversities Pandemic and Epidemiological Research

\*mag84@cam.ac.uk (corresponding author), †jrg20@cam.ac.uk

This version: February 16, 2023

## Abstract

Virus evolution shapes the epidemiological patterns of infectious disease, particularly via evasion of population immunity. At the individual level, host immunity itself may drive viral evolution towards antigenic escape. Using compartmental SIR-style models with imperfect vaccination, we allow the probability of immune escape to differ in vaccinated and unvaccinated hosts. As the relative contribution to selection in these different hosts varies, the overall effect of vaccination on the antigenic escape pressure at the population level changes.

We find that this relative contribution to escape is important for understanding the effects of vaccination on the escape pressure and we draw out some fairly general patterns. If vaccinated hosts do not contribute much more than unvaccinated hosts to the escape pressure, then increasing vaccination always reduces the overall escape pressure. In contrast, if vaccinated hosts contribute significantly more than unvaccinated hosts to the population level escape pressure, then the escape pressure is maximised for intermediate vaccination levels. Past studies find only that the escape pressure is maximal for intermediate levels with fixed extreme assumptions about this relative contribution. Here we show that this result does not hold across the range of plausible assumptions for the relative contribution to escape from vaccinated and unvaccinated hosts.

We also find that these results depend on the vaccine efficacy against transmission, particularly through the partial protection against infection. This work highlights the potential value of understanding better how the contribution to antigenic escape pressure depends on individual host immunity.

**Keywords:** SARS-CoV-2, COVID-19, antigenic escape, vaccine escape pressure, phylodynamics

## 1 Introduction

Vaccines against infectious pathogens reduce incidence and deaths, although there is a risk that they could favour new antigenic variants [1]. For example, since population immunity against circulating SARS-CoV-2 variants controls virus spread [2], the long-term dynamics of the COVID-19 pandemic depend on the evolutionary trajectory of the virus [1]. Here we investigate how vaccination changes the appearance probability of strains capable of evading host immunity, relative to the baseline of no

NOTE: This preprint reports new research that has not been certified by peer review and should not be used to guide clinical practice.

32 vaccination. Antigenic escape is complex, with strains generated and selected on various scales [3].  
33 We focus exclusively on the *generation* of escape strains [4], [5], rather than on their establishment  
34 after they first appear [6], [7]. Our work builds on other mathematical studies of COVID-19 immune  
35 escape risk [4], [5], [8]. We pay particular attention to selection in vaccinated hosts, relative to the  
36 unvaccinated.

37 Evolution of antigenic traits in SARS-CoV-2 (severe acute respiratory syndrome coronavirus 2) [9]  
38 generates new variants [10]. Some of these variants (B.1.1.7, *alpha*; B.617.2, *delta*) appear to have  
39 a transmission advantage over their precursors [11]. B.1.1.529 —*omicron*—significantly escapes ex-  
40 isting immunity [12], but variants with immune escape, at least to some extent, date back to 2020,  
41 before the roll-out of vaccines (B.1351, *beta*; B.617.2, *delta*) [11]. Therefore it is important to under-  
42 stand how vaccination impacts antigenic drift. Vaccines may affect the evolution of other pathogen  
43 traits, such as virulence [13], but we focus on immune escape.

44 To the best of our knowledge, there is not yet evidence to assess how COVID-19 vaccines impact  
45 virus genomic diversity in an individual host [14]. Some COVID-19 models assume that escape  
46 occurs only or primarily in hosts with previous immunity [4], [5]. On the contrary, others assume that  
47 vaccination entirely prevents infection [8], and thus escape can only occur in unvaccinated hosts.

48 Models for pathogens other than SARS-CoV-2 often assume that viruses mutate at the same rate in  
49 all hosts [7], [15], [16], [17]. However, in human Influenza A, host immunity can select for antigenic  
50 mutations [18]. This effect may be important [19] for more ambitious vaccination campaigns, such as  
51 a universal influenza vaccine [20].

52 In this paper, we follow the minimal approach of others (for example, [4]) to define an escape pressure  
53 function proportional to the number of infections. Given that we do not generally know the relative se-  
54 lective pressures exerted by infections in vaccinated hosts compared to the unvaccinated, we explore  
55 a range of values for this contribution to escape. We define a parameter (Section 2.2) that measures  
56 this relative contribution to escape. We use this parameter to express the escape pressure in terms  
57 of the infections in vaccinated and unvaccinated hosts. We combine this with deterministic compart-  
58 mental models (Section 2.1) for vaccination that provides lifelong imperfect immunity. We explore two  
59 scenarios: a single wave and endemic disease. We calculate the resultant escape pressure in each  
60 of these contexts and describe how it changes as the vaccination coverage varies. We find the trade-  
61 off between selection and the vaccine efficacies (VEs) in the escape pressure of a fully-vaccinated  
62 population and the vaccination coverage that maximises the escape pressure (Section 3).

63 We find that the relative selection strength from infections in vaccinated and unvaccinated hosts  
64 shapes the escape pressure. In particular, we find two different qualitative behaviours for how the  
65 escape pressure depends on the vaccination coverage. These two behaviours are separated by a  
66 threshold value of this relative contribution to escape, in which vaccinated hosts contribute individually  
67 somewhat more to escape than the unvaccinated. If the relative contribution to escape is below this  
68 threshold, vaccination always reduces antigenic escape, as in [15]. However, above this threshold,  
69 intermediate vaccination levels are the most likely to generate escape strains, as in [4]. We also find  
70 that the susceptibility reduction provided by the vaccines has a large effect on the escape pressure.  
71 The reduction in infectiousness is less important, but still lowers escape by reducing prevalence.

## 72 2 Methods

### 73 2.1 Epidemic models

74 We use systems of ordinary differential equations (ODEs) to model disease transmission. We as-  
75 sume that the population is well-mixed and a single-strain infectious disease circulates unaffected by

any escape strain it may have generated. We consider two epidemiological scenarios. In scenario (a) the outbreak is transient, which can be interpreted as a single epidemic wave. In scenario (b) the system is modified so that it reaches a non-zero equilibrium, corresponding to endemic disease.

We separate individuals by vaccination status and assume that vaccine immunity does not wane. We scale time so that the recovery rate is 1. In our models, the vaccines are not assumed to be perfect: vaccinated individuals can become infected, albeit at a lower rate, contributing to the escape pressure. We split the (imperfect) transmission blocking from vaccines into two components,  $\theta_S$  and  $\theta_I$ , as defined in [4].  $\theta_S$  is the susceptibility reduction (VE against infection):  $\theta_S = 0$  corresponds to perfect protection, while  $\theta_S = 1$  corresponds to no protection. Similarly,  $\theta_I$  is the infectivity reduction (VE against transmission), if an infection occurs. For mathematical convenience, the reduction in susceptibility from vaccination is polarised [16]: some vaccinated individuals are entirely immune to the infection, while the rest are as susceptible as the unvaccinated. Appendix A.2 shows that the same qualitative results hold with an alternative formulation for immunity.

In both scenarios,  $S_U$  and  $S_V$  are the vaccinated and unvaccinated proportions of the population susceptible to the disease;  $I_U$  and  $I_V$ , the vaccinated or unvaccinated proportions that are infected;  $R_U$  and  $R_V$ , the vaccinated or unvaccinated recovered proportions.  $R_0$  is the basic reproduction number and  $c$  is the proportion of the population who are vaccinated.

### Scenario (a): transient epidemic

In the transient scenario, recovered hosts have full permanent immunity and the system is

$$\dot{S}_U = -S_U \lambda(t) \qquad \dot{S}_V = -S_V \lambda(t) \qquad (1)$$

$$\dot{I}_U = S_U \lambda(t) - I_U \qquad \dot{I}_V = S_V \lambda(t) - I_V \qquad (2)$$

$$\dot{R}_U = I_U \qquad \dot{R}_V = I_V \qquad (3)$$

with  $\lambda(t) = R_0(I_U + \theta_I I_V)$ , the force of infection. The initial conditions are  $S_U = 1 - c$ ,  $S_V = c\theta_S$ ,  $R_U = 0 = R_V$ , and an infinitesimal number of infected individuals. The remaining  $c(1 - \theta_S)$  proportion of the population has full immunity from vaccination, so they do not appear in the compartments of the system. Appendix A.1 shows that for polarised vaccine immunity—and non-assortative mixing as here—the original proportion between vaccinated and unvaccinated susceptibles is maintained and extended to the other compartments:

$$(S_V, I_V, R_V) = \frac{c\theta_S}{1 - c} (S_U, I_U, R_U) \qquad (4)$$

This relation (4) reduces the system to:

$$\dot{S}_U = -S_U I_U R_0 \left( 1 + \frac{c\theta_S \theta_I}{1 - c} \right) \qquad \dot{I}_U = +S_U I_U R_0 \left( 1 + \frac{c\theta_S \theta_I}{1 - c} \right) - I_U \qquad (5)$$

$$S_U(0) = 1 - c \qquad I_U(0) = \epsilon \ll 1 \qquad (6)$$

where  $\epsilon$  accounts for the initial cases. (5)-(6) describe a standard SIR model, up to rescaling the effective reproduction number and the population size. The initial effective reproduction number is  $R_e = R_0[1 - c + c\theta_S \theta_I]$ . If the vaccination coverage is above  $\tilde{c} = (1 - R_0^{-1})/(1 - \theta_S \theta_I)$ , herd immunity prevents an outbreak and prevalence decreases exponentially. From (5)-(6), if  $c < \tilde{c}$ , the cumulative infections in unvaccinated hosts are  $C_U = (1 - c) (1 + W(-R_e e^{-R_e})/R_e)$ , where  $W$  is the Lambert-W function [21] (see Appendix A.1). Using (4), the cumulative breakthrough infections are  $C_V = c\theta_S (1 + W(-R_e e^{-R_e})/R_e)$ .

## 109 Scenario (b): endemic disease

110 To achieve an endemic scenario, we consider two possible extensions of the SIR model (1)-(3) that  
 111 replace susceptibles. If starting from the same initial conditions as in the transient scenario, these  
 112 extensions reach an endemic state if  $R_e > 1$ . In both cases, we find the proportions  $I_U^*, I_V^*$  of infected  
 113 individuals at the endemic equilibrium. Both models lead the same expressions for the prevalences  
 114  $I_U^*, I_V^*$ , up to an overall constant of proportionality  $(I_U^*, I_V^*) \propto (1 - c, c\theta_S)(1 - 1/R_e)$ .

115 In the first extension, we assume that immunity from infections wanes at a constant rate  $\omega$ , instead of  
 116 being permanent. We still assume that vaccine immunity is lifelong. The modified ODEs are

$$\dot{S}_U = -S_U\lambda(t) + \omega R_U \quad \dot{S}_V = -S_V\lambda(t) + \omega R_V \quad (7)$$

$$\dot{I}_U = S_U\lambda(t) - I_U \quad \dot{I}_V = S_V\lambda(t) - I_V \quad (8)$$

$$\dot{R}_U = I_U - \omega R_U \quad \dot{R}_V = I_V - \omega R_V \quad (9)$$

117 with  $\lambda$  as before. We use (4), which still holds (see Appendix A.1), to find the endemic state (setting  
 118 to zero the time-derivatives). For  $R_e > 1$ , there is a stable equilibrium state with  $I_U^* = (1 - c)(1 -$   
 119  $R_e^{-1})/(1 + \omega^{-1}) = (1 - c)I_V^*/c\theta_S$ .

120 In the second extension, we include births and deaths, at the same homogeneous per capita rate  $\mu$ ,  
 121 so that the population size is conserved. A proportion  $c$  of the population is vaccinated at birth. We  
 122 assume that neither infection nor immunity are maternally transmitted. Therefore, the births appear  
 123 in  $\dot{S}_U$  and  $\dot{S}_V$  as  $\mu(1 - c)$  and  $\mu c\theta_S$ . The number of individuals  $V$  with full vaccine immunity obeys  
 124  $\dot{V} = \mu c(1 - \theta_S) - \mu V$  with  $V(0) = c(1 - \theta_S)$ , so  $V(t) = c(1 - \theta_S)$  at all times. The new ODEs are

$$\dot{S}_U = \mu(1 - c) - S_U\lambda - \mu S_U \quad \dot{S}_V = \mu c\theta_S - S_V\lambda - \mu S_V \quad (10)$$

$$\dot{I}_U = S_U\lambda - I_U - \mu I_U \quad \dot{I}_V = S_V\lambda - I_V - \mu I_V \quad (11)$$

$$\dot{R}_U = I_U - \mu R_U \quad \dot{R}_V = I_V - \mu R_V \quad (12)$$

125 with  $\lambda$  as before. Condition (4) still holds (see Appendix A.1). For  $R_e > 1 + \mu$ , there is an endemic  
 126 state  $I_U^* = \mu(1 - c) [1/(1 + \mu) - 1/R_e] = (1 - c)I_V^*/c\theta_S$ . For  $\mu \ll 1$ , which corresponds to an infectious  
 127 period much shorter than the host's life expectancy,  $(I_U^*, I_V^*) = \mu [1 - R_e^{-1}] (1 - c, c\theta_S)$  to leading  
 128 order in  $\mu$ .

## 129 2.2 Escape pressure

130 We take a simple approach building on [4] to study the generation of strains at the population-level.  
 131 We assume that the escape pressure  $P$  depends linearly on the number of cases at that time, as

$$P(t) = I_U(t) + \theta_E I_V(t) \quad (13)$$

132 Underlying this factor is the assumption that each infection contributes very slightly to escape poten-  
 133 tial. We weight the (breakthrough) infections in vaccinated hosts  $I_V$ , relative to the infections in naïve  
 134 hosts  $I_U$ , by a factor  $\theta_E$ . Only the relative value of  $P$  is important (see equations (16), (17)), so we  
 135 only need the relative weighting  $\theta_E$  amongst infection in the vaccinated and unvaccinated rather than  
 136 their absolute contribute to escape.  $\theta_E$  is comparable to the vaccine efficacies  $\theta_S, \theta_I$  of Section 2.1, in  
 137 that it is a factor that reflects a change in a single host induced by vaccination. For example, if  $\theta_E > 1$ ,  
 138 vaccinated hosts infected with the resident strain would be more likely to pass on escape strains than  
 139 the unvaccinated. Lower viral loads ( $\theta_I < 1$ ) and shorter infections in the vaccinated [22] could lead  
 140 to fewer mutations [23]. However, escape strains may avoid the vaccine-induced immunity that the  
 141 original strain faces [24], and may be selected within a host enough to be transmitted to others [23].  
 142 There is no prior reason to exclude any value  $\theta_E \geq 0$ , so we explore the full range.

143 The escape pressure as in equation (13) is time-dependent.  $P(t)$  scales roughly with the total number  
 144 of cases. For the models of Section 2.1 with polarised immunity, the number of infected individuals in  
 145 the unvaccinated and vaccinated compartments,  $I_U(t)$ ,  $I_V(t)$  are proportional to each other (equation  
 146 (4)). Therefore, for fixed  $\theta_E$  and vaccination coverage,  $P(t)$  is proportional to the prevalence. This  
 147 scaling fails if equation (4) does not hold (for example in the model with leaky immunity of Appendix  
 148 A.2). In general, the escape pressure as a function of time is a linear superposition of the curves for  
 149 infections in vaccinated and unvaccinated hosts. Nonetheless, our main interest is how the escape  
 150 pressure depends on the vaccination coverage  $c$  and  $\theta_E$ . Hence, we need a reasonable way to  
 151 eliminate the time-dependency of  $P(t)$ . For the transient scenario, we consider the cumulative escape  
 152 pressure throughout the full wave  $P_a(c) = \int_0^\infty P(t)dt = C_U + \theta_E C_V$ . For the endemic scenario, we  
 153 study the asymptotic value of  $P$  at the endemic equilibrium  $P_b(c) = \lim_{t \rightarrow \infty} P(t) = I_U^* + \theta_E I_V^*$ . With  
 154 the expressions for  $C_U, C_V, I_U^*, I_V^*$  from Section 2.1,

$$P_a(c) = C_U + \theta_E C_V = (1 - c + \theta_S \theta_E c) \left( 1 + \frac{1}{R_e} W(-R_e e^{-R_e}) \right) \quad \text{if } R_e > 1, \text{ else zero} \quad (14)$$

$$P_b(c) = I_U^* + \theta_E I_V^* \propto (1 - c(1 - \theta_S \theta_E)) \left( 1 - \frac{1}{R_e} \right) \quad \text{if } R_e > 1, \text{ else zero} \quad (15)$$

155 To study the differential effect of the vaccination coverage on the escape pressure, we normalise the  
 156 expressions (14) and (15) by their value at  $c = 0$  (in the absence of vaccination):

$$\hat{P}_a(c) = \frac{P_a(c)}{P_a(0)} = (1 - c(1 - \theta_S \theta_E)) \frac{1 + W(-R_e e^{-R_e}) R_e^{-1}}{1 + W(-R_0 e^{-R_0}) R_0^{-1}} \quad \text{if } R_e > 1, \text{ else zero} \quad (16)$$

$$\hat{P}_b(c) = \frac{P_b(c)}{P_b(0)} = (1 - c(1 - \theta_S \theta_E)) \frac{1 - R_e^{-1}}{1 - R_0^{-1}} \quad \text{if } R_e > 1, \text{ else zero} \quad (17)$$

157 If  $\hat{P}_*(c) > 1$  (where  $*$  is  $a$  or  $b$ ), the vaccination coverage  $c$  increases the escape pressure from no  
 158 vaccination (in scenario (a) or (b), respectively). Expressions (16), (17) are similar, but  $\hat{P}_a$  and  $\hat{P}_b$   
 159 should not be compared between each other. They correspond to distinct epidemiological scenarios  
 160 and have different derivations from the time-dependent escape pressure  $P(t)$  of equation (13).

### 161 3 Results

162 First, we focus on the effects of  $\theta_E$  on the escape pressure in a fully vaccinated population. We vary  
 163  $\theta_S, \theta_I$  and  $\theta_E$ , and fix the vaccination coverage at  $c = 1$ . If vaccination does not prevent the epidemic,  
 164 i.e.,  $R_0 \theta_S \theta_I < 1$ :

$$\hat{P}_a(1) = \theta_S \theta_E \left( \frac{1 + \frac{1}{R_0 \theta_S \theta_I} W(-R_0 \theta_S \theta_I e^{-R_0 \theta_S \theta_I})}{1 + \frac{1}{R_0} W(-R_0 e^{-R_0})} \right), \quad \hat{P}_b(1) = \theta_S \theta_E \left( \frac{1 - \frac{1}{R_0 \theta_S \theta_I}}{1 - \frac{1}{R_0}} \right) \quad (18)$$

165 and  $\hat{P}_*(1) = 0$  for  $R_0 \theta_S \theta_I \geq 1$ . Both expressions in (18) depend only on  $R_0, \theta_S \theta_I$  and  $\theta_S \theta_E$ , but this  
 166 dependence changes for “leaky” immunity (see Appendix A.2). Figures 1a, S1a show how the escape  
 167 pressure in a fully vaccinated population  $\hat{P}_*(1)$  depends on the vaccine parameters  $\theta_S, \theta_I$  and  $\theta_E$ . As  
 168 expected, it is unchanged relative to no vaccination ( $\hat{P}_*(1) = 1$ ) when  $\theta_E = 1 = \theta_S = \theta_I$ , because  
 169 then vaccines have no effect in our model. For a fixed VE, the escape pressure increases with  $\theta_S \theta_E$ ,  
 170 because escape becomes more likely in the vaccinated. Similarly, for fixed  $\theta_S \theta_E$ , the escape pressure  
 171 decreases as the vaccines become more effective, because fewer infections reduce the opportunities  
 172 for escape mutations. Therefore, the escape pressure in a fully-vaccinated population is less than  
 173 in an unvaccinated population ( $\hat{P}_*(1) < 1$ ) if the population is close enough to herd-immunity. As

| category                   | item                       | description                                                               |
|----------------------------|----------------------------|---------------------------------------------------------------------------|
| vaccine parameters         | $\theta_S \in [0, 1]$      | susceptibility reduction (VE against infection)                           |
|                            | $\theta_I \in [0, 1]$      | infectivity reduction (VE against transmission)                           |
|                            | $\theta_E \in [0, \infty]$ | relative escape contribution of breakthrough infections                   |
| epidemiological parameters | $R_0 \in [0, \infty)$      | initial basic reproduction number, here assumed $R_0 > 1$                 |
|                            | $c \in [0, 1]$             | vaccination coverage of the population                                    |
|                            | $R_e(c) \in [0, \infty)$   | initial effective basic reproduction number, assumed $R_e > 1$            |
|                            | $\tilde{c} \in [0, 1]$     | vaccination coverage $c$ threshold for $R_e = 1$                          |
| escape pressure            | $P(t)$                     | unscaled and time-dependent, as defined in equation (13)                  |
|                            | $\hat{P}_a(c)$             | normalized and cumulative (transient polarised scenario)                  |
|                            | $\hat{P}_a'(c)$            | normalized and cumulative (transient leaky model of A.2)                  |
|                            | $\hat{P}_b(c)$             | normalized and asymptotic (endemic polarised scenario)                    |
| output parameters          | $c_m$                      | vaccination level $c$ that maximises the escape pressure                  |
|                            | $c_m^\infty$               | vaccination level $c$ that maximises breakthrough cases                   |
|                            | $\hat{\theta}_E$           | threshold value of $\theta_E$ , defined by $d\hat{P}_*/dc = 0$ at $c = 0$ |
|                            | $\hat{\theta}_S$           | threshold value of $\theta_S$ , defined by $d\hat{P}_*/dc = 0$ at $c = 0$ |
|                            | $\hat{\theta}_I$           | threshold value of $\theta_I$ , defined by $d\hat{P}_*/dc = 0$ at $c = 0$ |

**Table 1:** Parameters and functions from our model that appear in the results section. For the input vaccine and epidemiological parameters, we specify their ranges of feasible values. The realised values of the output parameters (bottom block of the table) differ between scenarios.

174 a consequence,  $\theta_S\theta_E < 1$  is not necessary for  $\hat{P}_*(1) < 1$ . It is sufficient, because if  $\theta_E\theta_S < 1$ ,  
 175 vaccination blocks the expected escape so  $\hat{P}_*(1) < 1$  unsurprisingly. Our results shows that vaccines  
 176 can reduce the total escape pressure even if  $\theta_S\theta_E > 1$ .

177 Next, we consider how the escape pressure changes with a variable vaccination coverage  $c$ , and  
 178 how this is affected by  $\theta_E$ . We keep  $\theta_S$  and  $\theta_I$  fixed for simplicity. Figures 1b, S1b show the escape  
 179 pressure  $\hat{P}_*$  as a function of  $c$  and  $\theta_E$ , for fixed VEs. Intuitively, the escape pressure decreases to  
 180 zero as the vaccination coverage approaches  $\tilde{c}$ , the herd immunity threshold ( $\tilde{c} < 1$  here). When vac-  
 181 cination is slightly below  $\tilde{c}$ , the outbreak is small (a few infections are enough to build herd immunity)  
 182 so there are fewer opportunities for escape. It is helpful to consider the vaccination coverage that  
 183 maximises the escape pressure, which we call  $c_m$ , as it depends on  $\theta_E$ . If  $\theta_E$  is below a threshold  
 184  $\hat{\theta}_E$ , then  $c_m = 0$ . The escape pressure simply decreases with  $c$ , because reducing cases outweighs  
 185 the escape pressure from breakthrough cases. If  $\theta_E > \hat{\theta}_E$ , then  $c_m > 0$ . Breakthrough infections can  
 186 drive evolution and reducing cases may not suffice to reduce the escape pressure, which has a uni-  
 187 modal shape. We can characterise these results analytically. Here we refer to the endemic scenario  
 188 (Appendix A.1 discusses the transient scenario). Since  $P_b(c)$  is concave ( $d^2P_b/dc^2 < 0$ ), by (17), the  
 189 condition for a peak of the escape pressure at a non-zero vaccination level ( $c_m > 0$ ) is

$$0 < \left. \frac{dP_b}{dc} \right|_{c=0} = \frac{1}{R_0} ((\theta_E\theta_S - 1)(R_0 - 1) - (1 - \theta_S\theta_I)) \iff \frac{1}{\theta_S} \frac{R_0 - \theta_S\theta_I}{R_0 - 1} =: \hat{\theta}_E \quad (19)$$

190 Figure S5 plots  $\hat{\theta}_E$ , as given by (19). Interpreting  $1 - \theta_S\theta_I$  as the transmission-blocking and  $\theta_E\theta_S -$   
 191  $1$  as the escape boost provided by the vaccines, the condition (19) can be rewritten as (escape  
 192 boost)  $\times (R_0 - 1) >$  (transmission-blocking). If (19) is satisfied, we solve  $dP_b/dc = 0$  for the maximiser  
 193 of the escape pressure  $c_m = (1 - \theta_S\theta_I)^{-1} \left[ 1 - \sqrt{1 + (1 - \theta_S\theta_I)/(\theta_S\theta_E - 1)}/\sqrt{R_0} \right]$ . As expected,  
 194  $c_m$  continuously increases with  $\theta_E$  from zero (at  $\theta_E = \hat{\theta}_E$ ). In the limit  $\theta_E \rightarrow \infty$  only breakthrough  
 195 infections contribute to  $P_b$ , the analytical expression for  $c_m$  tends to  $(1 - 1/\sqrt{R_0})/(1 - \theta_S\theta_I) =:$   
 196  $c_m^\infty$ . This number  $c_m^\infty$  can be obtained directly as the vaccination coverage that maximises the total  
 197 number of infections in vaccinated hosts. If herd-immunity from vaccination alone is not possible

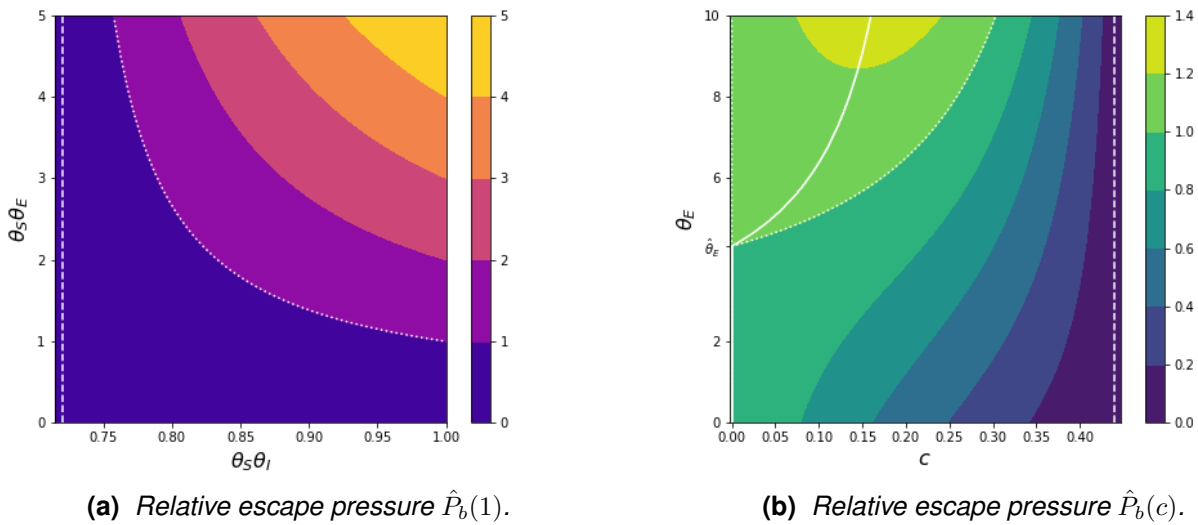

**Figure 1:** (a): Escape pressure  $\hat{P}_b(1)$  in a fully vaccinated population relative to an unvaccinated population. White dotted curve ( $\hat{P}_b(1) = 1$ ): vaccine parameters that give the same escape as in an unvaccinated population. White dashed line: VE that prevents an epidemic in a fully vaccinated population (the horizontal axis is scaled to above this value).  $R_0 = 1.4$ . (b): Escape pressure  $\hat{P}_b(c)$  for variable vaccination coverage  $c$  and relative contribution to escape  $\theta_E$  from the vaccinated, relative to an unvaccinated population. White solid curve: the vaccination coverage,  $c_m$ , at which the escape pressure peaks, as a function of  $\theta_E$ . White dotted curve ( $\hat{P}_b(c) = 1$ ): combination of  $c$  and  $\theta_E$  that give the same escape in a population as in an unvaccinated population. Dashed line: vaccination coverage for herd-immunity threshold (the horizontal axis only shows values of  $c$  below this).  $\theta_S, \theta_I = 0.6$ ,  $R_0 = 1.4$ .

198 ( $\tilde{c} > 1$ ), Figure S6 shows that a fully vaccinated population ( $c = 1$ ) can have the largest escape  
 199 pressure. However, this does not happen ( $c_m^\infty < 1$ ) if and only if  $\sqrt{R_0}\theta_S\theta_I < 1$ , which holds if the  
 200 threshold coverage for  $R_e < 1$  is less than one ( $\tilde{c} < 1$ ), because then  $R_0\theta_S\theta_I < 1 < R_0$ . Therefore,  
 201 unsurprisingly, the escape pressure cannot peak at  $c = 1$  if  $\tilde{c} < 1$  (since  $c = 1$  prevents the epidemic).

202 Finally, we study how each of  $\theta_S, \theta_I$  affects the escape pressure as the vaccination coverage varies.  
 203 When infections in the vaccinated drive selection ( $\theta_E$  is large),  $\theta_S$  contributes more to the escape  
 204 pressure than  $\theta_I$ . Both reduce the total number of cases at the same rate, through  $R_e = R_0(1 - c(1 -$   
 205  $\theta_S\theta_I))$ . Additionally,  $\theta_S$  (partially) protects the vaccinated from infections, so it lowers the proportion  
 206 of the total cases in the vaccinated. Hence, if  $\theta_E > 1$ , a vaccine that reduces susceptibility has a  
 207 quantitatively stronger effect on the escape pressure than a vaccine that reduces infectivity. Figures 2,  
 208 S2, S3, S4 demonstrate that the escape pressure is more sensitive to  $\theta_S$  than  $\theta_I$ . In particular, Figures  
 209 2, S2 show that a sufficiently low  $\theta_S$  can lead to the escape pressure peaking at no vaccination  
 210 ( $c_m = 0$ ), while for the same background parameter values the escape pressure peaks at intermediate  
 211 vaccination levels ( $c_m > 0$ ), regardless of  $\theta_I$ . We can define threshold values  $\hat{\theta}_x$  ( $x = S, I$ ) similar  
 212 to  $\hat{\theta}_E$  (see Figure 1b, S5), such that  $\theta_x < \hat{\theta}_x$  is the condition for the escape pressure to peak at no  
 213 vaccination ( $c_m = 0$ ). Figures 2a, S2a, S3a all have  $\hat{\theta}_S \in (0, 1)$ , while  $\hat{\theta}_I \in (0, 1)$  only appears in  
 214 Figure S3b. In the endemic scenario, (19) gives  $\hat{\theta}_S = R_0/(\theta_E(R_0 - 1) + \theta_I)$  and  $\hat{\theta}_I = (1 - (\theta_E\theta_S -$   
 215  $1)(R_0 - 1))/\theta_S$ . The expression for  $\hat{\theta}_I$  can be negative, but  $\theta_I$  is always positive. Therefore, if  $\hat{\theta}_I$   
 216 is negative, the escape pressure peaks at intermediate levels, as in Figure 2b. On the contrary,  $\hat{\theta}_S$   
 217 is always positive, so if vaccines fully prevent infection ( $\theta_S = 0$ ), vaccination always reduces the escape  
 218 pressure ( $c_m = 0$ ).

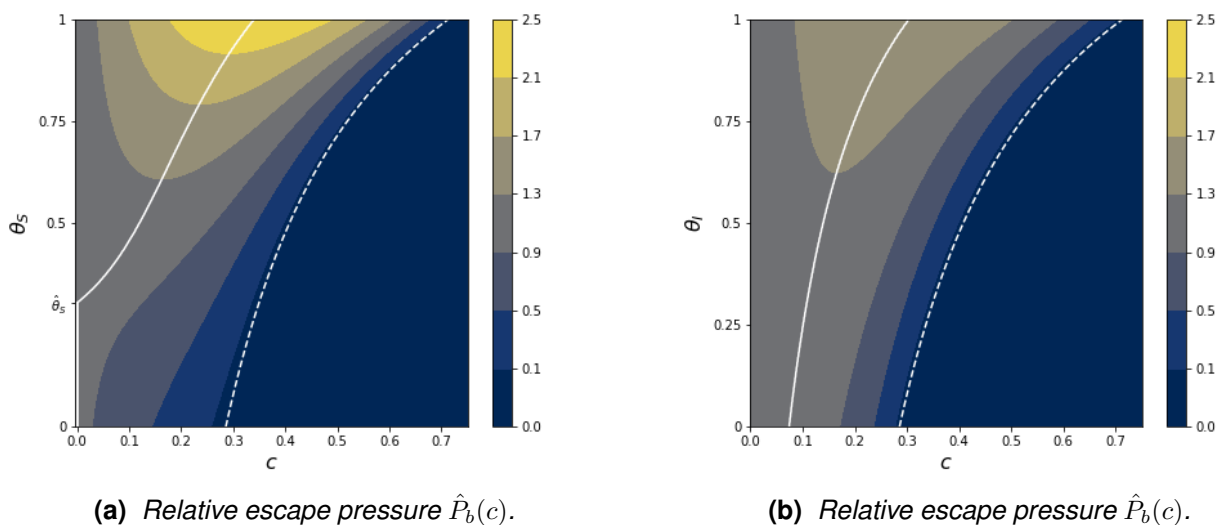

**Figure 2:** Relative escape pressure  $\hat{P}_b(c)$  at fixed  $R_0 = 1.4$  and a high relative contribution to escape from the vaccinated,  $\theta_E = 10$ . (a) has fixed  $\theta_I = 0.6$  and the susceptibility VE  $\theta_S$  varies. (b) has fixed  $\theta_S = 0.6$  and the infectiousness VE  $\theta_I$  varies. On both (a) and (b), the white solid curves mark the vaccination coverage,  $c_m$ , at which the escape pressure peaks; the dashed lines give the herd-immunity threshold. Considered together, (a) and (b) show that there is more variation in the relative escape pressure if  $\theta_S$  varies and  $\theta_I$  is fixed.

## 219 4 Discussion

### 220 4.1 Summary of findings

221 Introducing a new parameter,  $\theta_E$ , we have explored the effect of the contribution to immune escape  
 222 of cases in vaccinated hosts, relative to the unvaccinated. Taking a parsimonious modelling ap-  
 223 proach we have studied how the population escape pressure depends on the vaccination coverage,  
 224 the vaccine efficacies and  $\theta_E$ . We have found that  $\theta_E$  is critical to determine how the escape pres-  
 225 sure depends on the vaccination coverage. If  $\theta_E$  is low, escape decreases with vaccination. As  $\theta_E$   
 226 increases, so that vaccinated hosts contribute relatively more to escape, escape is largest at inter-  
 227 mediate vaccination levels. Therefore, our results show that models of immune escape should take  
 228 into account the relative contribution to escape of cases in hosts with imperfect immunity. Our results  
 229 also show mathematically that vaccines which are effective in reducing transmission can generally  
 230 reduce the population escape pressure, even if they favour escape strains in individual hosts.

### 231 4.2 Implications for modelling evolution with imperfect immunity

232 Our results highlight not only the importance of  $\theta_E$  itself, but also the role in reducing escape of  
 233  $\theta_S$ , the susceptibility vaccine efficacy (VE), especially when vaccinated hosts contribute relatively  
 234 more to escape ( $\theta_E > 1$ ). Our results show mathematically the need to consider separately the VEs  
 235 against infection (susceptibility) and onwards transmission (infectiousness). A purely epidemic model  
 236 which does not consider immune-induced escape only needs the overall transmission-blocking VE  
 237 [4]. However, our escape pressure is more sensitive to a reduction in susceptibility than infectivity.  
 238 The susceptibility VE not only reduces infections but specifically protects the vaccinated, who may  
 239 exert more selection pressure. Traditional models assume that partial immunity confers only reduced  
 240 susceptibility or infectivity [16]. Often the dynamics are qualitatively the same [25], so the choice of VE



241 is usually based on tractability [16]. Our work suggests that evolutionary models should split infections  
242 by immune status, so that  $\theta_E$  can be used, and consider the susceptibility VE separately from the  
243 transmissibility VE, so that  $\theta_S$  and  $\theta_E$  can regulate together the escape pressure. These points may  
244 also apply in multi-strain models where partial cross-immunity drives evolution [16]. Furthermore,  
245 the contribution to escape of an infected host may change with different vaccine types or number of  
246 doses, so along different VEs, different  $\theta_E$ s may be needed. Parameters akin to  $\theta_E$  could also be  
247 appropriate for other phylodynamic models.

### 248 4.3 Relation to existing results

249 As in previous work [8], [3], in our models intermediate vaccination levels could lead to the largest  
250 selection pressure for antigenic escape. The same conclusion holds for a wide range of  $\theta_S$  and  $\theta_I$   
251 values [4] when dividing the population in two subgroups with different contact rates. This population-  
252 level result is analogous [4] to the within-host phylodynamic trade-off between viral load and selection  
253 pressure [23]. Our works shows that a population-level trade-off can appear without mixing hetero-  
254 geneity, stochasticity, or detailed within-host dynamics. Past work implicitly uses fixed choices of  $\theta_E$   
255 or the VEs (or both). We instead specify the region of  $(\theta_E, \theta_S, \theta_I)$  parameter space in which interme-  
256 diate vaccination levels maximise the escape pressure. Beyond this region, vaccination reduces the  
257 escape pressure, as in [15].

### 258 4.4 Limitations and further work

259 Due to the simplicity of our approach, many epidemiological and evolutionary processes could mod-  
260 ify our results. We assume that there are no changing mitigation measures, behavioural changes  
261 or seasonality effects. Vaccination comes through a single dose of a unique vaccine, administered  
262 before the outbreak or at birth. Further work could consider ongoing vaccination, as in [8]. We also  
263 neglect the waning of vaccine immunity and assume complete immunity after infection. Infections in  
264 individuals with partial or waned immunity may contribute with a different weight to the escape pres-  
265 sure [5]. Heterogeneity in mixing, susceptibility and transmissibility could all play a role in evolution. It  
266 may be best to vaccinate first those with more contacts [4], or immunocompromised hosts, who might  
267 contribute significantly more to the escape pressure [26]. Moreover, unlike in COVID-19 [22], both  
268 scenarios explained here assume that vaccination does not change the recovery rate and that the  
269 disease is not fatal. Disease-induced mortality, different infectious periods and hospitalisations would  
270 break the proportionality (4), since these effects would be larger in the unvaccinated. Similarly, lifting  
271 the well-mixing assumption and including any age or spatial structure could change these patterns.  
272 These assumptions are a tradeoff in favour of tractability and simplicity: the main objective of our of  
273 work is to gain as much insight as possible about the qualitative effect of  $\theta_E$  on the escape pressure.

274 Our escape pressure (13) is just a minimal abstraction of the interplay between vaccination and  
275 vaccine escape that might occur in real-life. Our work ignores the invasion dynamics of escape strains  
276 [6], but simply focuses on the pressure to generate one. An escape strain might be unable to grow  
277 if few individuals remain susceptible. In the transient scenario, this could occur if a strains appears  
278 late in the epidemic; in the endemic scenario, if the invasion fitness of the escape strain is not large  
279 enough for it to replace or coexist with the resident strain. Similarly, stochasticity could drive escape  
280 strains extinct shortly after their generation. For example, [8] finds that escape strains appearing in  
281 lockdowns are unlikely to survive stochastic extinction. Simple approaches to consider the outcome  
282 of the new variant [8], [6] could be incorporated in our models. However, this is a complex process  
283 [3], so a full description will require significant further development of models.

284 **Acknowledgements:** MAG is supported by the Gates Cambridge Trust (grant OPP1144 from the  
285 Bill & Melinda Gates Foundation).

286 **Declaration of interests:** We declare we have no competing interests.

## 287 References

- 288 [1] Telenti A, Arvin A, Corey L, Corti D, Diamond MS, García-Sastre A, et al. After the pandemic: perspectives on the future trajectory  
289 of COVID-19. *Nature*. 2021.
- 290 [2] Saad-Roy CM, Wagner CE, Baker RE, Morris SE, Farrar J, Graham AL, et al. Immune life history, vaccination, and the dynamics of  
291 SARS-CoV-2 over the next 5 years. *Science*. 2020.
- 292 [3] Morris DH, Petrova VN, Rossine FW, Parker E, Grenfell BT, Neher RA, et al. Asynchrony between virus diversity and antibody  
293 selection limits influenza virus evolution. *eLife*. 2020.
- 294 [4] Gog JR, Hill EM, Danon L, Thompson RN. Vaccine escape in a heterogeneous population: insights for SARS-CoV-2 from a simple  
295 model. *Royal Soc Open Sci*. 2021.
- 296 [5] Saad-Roy CM, Morris SE, Metcalf CJE, Mina MJ, Baker RE, Farrar J, et al. Epidemiological and evolutionary considerations of  
297 SARS-CoV-2 vaccine dosing regimes. *Science*. 2021.
- 298 [6] McLean AR. Vaccination, evolution and changes in the efficacy of vaccines: a theoretical framework. *Proc Royal Soc B*. 1995.
- 299 [7] Gandon S, Day T. The evolutionary epidemiology of vaccination. *J R Soc Interface*. 2007.
- 300 [8] Rella SA, Kulikova YA, Dermizakis ET, Kondrashov FA. Rates of SARS-CoV-2 transmission and vaccination impact the fate of  
301 vaccine-resistant strains. *Sci Rep*. 2021.
- 302 [9] Yewdell JW. Antigenic drift: Understanding COVID-19. *Immunity*. 2021.
- 303 [10] Parums DV. Editorial: Revised World Health Organization (WHO) Terminology for Variants of Concern and Variants of Interest of  
304 SARS-CoV-2. *Med Sci Monit*. 2021.
- 305 [11] Alizon S, Sofonea MT. SARS-CoV-2 virulence evolution: Avirulence theory, immunity and trade-offs. *J Evol Biol*. 2021.
- 306 [12] Hu J, Peng P, Cao X, Wu K, Chen J, Wang K, et al. Increased immune escape of the new SARS-CoV-2 variant of concern Omicron.  
307 *Cell Mol Immunol*. 2022.
- 308 [13] Gandon S, Mackinnon MJ, Nee S, Read AF. Imperfect vaccines and the evolution of pathogen virulence. *Nature*. 2001.
- 309 [14] Kennedy DA, Read AF. Monitor for COVID-19 vaccine resistance evolution during clinical trials. *PLOS Biol*. 2020.
- 310 [15] Wen FT, Malani A, Cobey S. The Potential Beneficial Effects of Vaccination on Antigenically Evolving Pathogens. *Am Nat*. 2022.
- 311 [16] Gog JR, Grenfell BT. Dynamics and selection of many-strain pathogens. *Proc Natl Acad Sci USA*. 2002.
- 312 [17] Boni MF, Gog JR, Andreasen V, Feldman MW. Epidemic dynamics and antigenic evolution in a single season of influenza A. *Proc*  
313 *Royal Soc B*. 2006.
- 314 [18] Hensley SE, Das SR, Bailey AL, Schmidt LM, Hickman HD, Jayaraman A, et al. Hemagglutinin receptor binding avidity drives  
315 influenza a virus antigenic drift. *Science*. 2009 10;326(5953):734-6.
- 316 [19] Kelvin AA, Falzarano D. The influenza universe in an mRNA vaccine. *Science*. 2022 11;378(6622):827-8.
- 317 [20] Arevalo CP, Bolton MJ, Le Sage V, Ye N, Furey C, Muramatsu H, et al. A multivalent nucleoside-modified mRNA vaccine against all  
318 known influenza virus subtypes. *Science*. 2022 11;378(6622):899-904.
- 319 [21] Lehtonen J. The Lambert W function in ecological and evolutionary models. *Methods Ecol Evol*. 2016.
- 320 [22] Kissler SM, Fauver JR, Mack C, Tai CG, Breban MI, Watkins AE, et al. Viral Dynamics of SARS-CoV-2 Variants in Vaccinated and  
321 Unvaccinated Persons. *N Engl J Med*. 2021.
- 322 [23] Grenfell BT, Pybus OG, Gog JR, Wood JLN, Daly JM, Mumford JA, et al. Unifying the Epidemiological and Evolutionary Dynamics  
323 of Pathogens. *Science*. 2004.
- 324 [24] Garcia-Beltran WF, Lam EC, St Denis K, Nitido AD, Garcia ZH, Hauser BM, et al. Multiple SARS-CoV-2 variants escape neutraliza-  
325 tion by vaccine-induced humoral immunity. *Cell*. 2021.
- 326 [25] Ferguson NM, Andreasen V. The Influence of Different Forms of Cross-Protective Immunity on the Population Dynamics of Anti-  
327 genically Diverse Pathogens. In: *Mathematical Approaches for Emerging and Reemerging Infectious Diseases: Models, Methods,*  
328 *and Theory. The IMA Volumes in Mathematics and its Applications.* vol. 126. Springer, New York, NY; 2002. p. 157-69.
- 329 [26] Choi B, Choudhary MC, Regan J, Sparks JA, Padera RF, Qiu X, et al. Persistence and Evolution of SARS-CoV-2 in an Immuno-  
330 compromised Host. *N Engl J Med*. 2020.

## 331 A Mathematical proofs

### 332 A.1 Polarised vaccine immunity

333 Using the notation of the main text, define column vectors  $\mathbf{u}(t)$  and  $\mathbf{v}(t)$  as

$$\mathbf{u}^T = (S_U(t), I_U(t), R_U(t)) \text{ and } \mathbf{v}^T = (S_V(t), I_V(t), R_V(t)) \quad (\text{A1})$$

334 where  $\mathbf{x}^T$  denotes the transpose of a vector  $\mathbf{x}$ . Consider an ODE system

$$\dot{\mathbf{u}} = \mathbf{M}\mathbf{u} \quad \dot{\mathbf{v}} = \mathbf{M}\mathbf{v} \quad (\text{A2})$$

335 for a time-dependent matrix  $\mathbf{M}$ , which possibly depends on  $\mathbf{u}$  and  $\mathbf{v}$ . Suppose initial conditions

$$\mathbf{v}(0) = \alpha\mathbf{u}(0) \quad (\text{A3})$$

336 for some constant  $\alpha$ .  $\hat{\mathbf{u}}(t) := \alpha^{-1}\mathbf{v}(t)$  and  $\mathbf{u}(t)$  obey the same first order differential equation (A2) and  
337 initial condition  $\mathbf{u}(0) = \hat{\mathbf{u}}(0)$ . Hence (by uniqueness of solutions),  $\hat{\mathbf{u}}(t) = \mathbf{u}(t)$ . Thus  $\mathbf{v}(t) = \alpha\mathbf{u}(t)$ .

### 338 Analytic results for the transient polarised model

339 The system (1)-(3) can be written in the form (A1)-(A3) with  $\mathbf{M}(t) = \begin{pmatrix} -\lambda(t) & 0 & 0 \\ \lambda(t) & -1 & 0 \\ 0 & +1 & 0 \end{pmatrix}$

340 and  $\alpha = c\theta_S/(1-c)$ . Thus  $(S_V(t), I_V(t), R_V(t)) = c\theta_S(1-c)^{-1}(S_U(t), I_U(t), R_U(t))$ . This relation (4)  
341 allows us to derive (5), which yields

$$\frac{\dot{I}_U}{\dot{S}_U} = \frac{dI_U}{dS_U} = -1 + \frac{1}{R_0 S_U} \left(1 + \frac{c\theta_S\theta_I}{1-c}\right)^{-1} \implies I_U = (1-c) - S_U - \left(1 + \frac{c\theta_S\theta_I}{1-c}\right)^{-1} \frac{1}{R_0} \log \frac{1-c}{S_U} \quad (\text{A4})$$

342 where the initial conditions (6) set the integration constant. The final size of the susceptible popula-  
343 tion,  $S_U^\infty = \lim_{t \rightarrow \infty} S_U(t)$ , is given implicitly by taking  $t \rightarrow \infty$  and setting  $0 = \lim_{t \rightarrow \infty} I_U(t)$ :

$$S_U^\infty = (1-c) - \left(1 + \frac{c\theta_S\theta_I}{1-c}\right)^{-1} \frac{1}{R_0} \log \frac{1-c}{S_U^\infty} = -\frac{1-c}{R_e} W(-R_e e^{R_e}) \quad (\text{A5})$$

344 The second equality expresses  $S_U^\infty$  in terms of the Lambert-W function [21] and  $R_e$ . From  $S_U^\infty$  we ob-  
345 tain (14) for the escape pressure  $P_a(c)$ , which we study here. For simplicity, we set  $W \equiv W(-R_e e^{-R})$   
346 and  $R \equiv R_e$ .

$$\frac{dP_a}{dc} + (1 - \theta_E\theta_S) \left(1 + \frac{1}{R} W(-R_e e^{-R})\right) = -R_0(1 - \theta_S\theta_I)(1 - c(1 - \theta_S\theta_E)) \frac{d}{dR} \frac{W(-R_e e^{-R})}{R} \quad (\text{A6})$$

$$= R_0(1 - \theta_S\theta_I)(1 - c(1 - \theta_S\theta_E)) \left[ \frac{W}{R^2} + \frac{1}{R} \frac{d}{dR} (-R_e e^{-R}) \frac{W}{(-R_e e^{-R})(1+W)} \right] \quad (\text{A7})$$

$$= WR_0(1 - \theta_S\theta_I)(1 - c(1 - \theta_S\theta_E)) \left[ \frac{1}{R^2} + \frac{1}{R} \frac{-e^R + R e^{-R}}{R e^{-R}(1+W)} \right] \quad (\text{A8})$$

$$= WR_0(1 - \theta_S\theta_I)(1 - c(1 - \theta_S\theta_E)) \frac{1}{R^2} \frac{W+R}{1+W} \implies \quad (\text{A9})$$

$$\frac{dP_a}{dc} = (1 + W/R) \left[ -(1 - \theta_E\theta_S) + (1 - \theta_S\theta_I) \frac{1 - c(1 - \theta_S\theta_E)}{1 - c(1 - \theta_S\theta_I)} \frac{W}{1+W} \right] \quad (\text{A10})$$

347 See, e.g., [21] for the derivative of the Lambert-W function used in (A7). We prove that there is either  
 348 none or one root ( $c = c_m$ ) solving  $dP_a/dc = 0$  in  $c \in [0, \tilde{c})$ .  $W \geq -1$ , and hence  $(1 + W/R) > 0$ ,  
 349 because  $R > 1$  for  $c < c_m$ . Thus it suffices to consider the sign and monotonicity of the bracketed  
 350 (right-most) term in (A10). First suppose  $(1 - \theta_S\theta_E) > 0$ , which means  $(1 - c(1 - \theta_S\theta_E)) > 0$ . Since  
 351  $W/(W + 1) < 0$ ,  $dP_a/dc < 0$ . So if  $\theta_E < 1/\theta_S$ , vaccination reduces the escape pressure regardless  
 352 of the coverage  $c$ . Now consider  $\theta_E\theta_S > 1$ .  $R$  decreases with  $c$  and  $R > 1$  for  $c < \tilde{c}$ .  $z := -Re^{-R} < 0$   
 353 increases with  $R > 1$ , so  $z$  decreases with  $c \in (0, \tilde{c})$ . The Lambert W function  $W(z)$  increases with its  
 354 argument  $z \in (-1/e, 0)$ , so it decreases with  $c$ .  $W/(1 + W)$  is an increasing function of  $W \in (0, -1)$   
 355 and hence it is a negative, decreasing function of  $c$ . These imply

$$\frac{d}{dc} \left[ \frac{1 + c(\theta_S\theta_E - 1)}{1 - c(1 - \theta_S\theta_I)} \frac{W}{1 + W} \right] = - \left| \frac{W}{W + 1} \right| \frac{d}{dc} \left( \frac{1 + c(\theta_S\theta_E - 1)}{1 - c(1 - \theta_S\theta_I)} \right) + \frac{1 + c(\theta_S\theta_E - 1)}{1 - c(1 - \theta_S\theta_I)} \frac{d}{dc} \left( \frac{W}{1 + W} \right) \quad (\text{A11})$$

356 where the first derivative in the RHS is positive and the second is negative. Hence the LHS is  
 357 negative. Thus  $dP_a/dc$  is a decreasing function of  $c$ , with at most one root,  $c_m$ . The if and only if  
 358 condition for  $c_m > 0$  is  $dP_a/dc > 0$  at  $c = 0$ . Evaluating (A10) at  $c = 0$ , the condition for  $c_m > 0$   
 359 becomes

$$\theta_E\theta_S - 1 > (1 - \theta_S\theta_I) \frac{-W_0}{W_0 + 1} =: \hat{\theta}_E\theta_S - 1 \quad \text{with } W_0 \equiv W(-R_0e^{-R_0}) \quad (\text{A12})$$

360 (A12), as (19), can be written in the form (escape boost)  $> g(R_0)$ (transmission blocking) for a function  
 361  $g$ . Here  $g(R_0) = -W_0/(1 + W_0)$ ; while in the endemic scenario,  $g(R_0) = 1/(R_0 - 1)$ .

## 362 Analytic results the endemic models

363 The SIRS system (7)-(9) can be written in the form (A1)-(A3) with  $\alpha = \frac{c\theta_S}{1-c}$  and  $\mathbf{M}(t) = \begin{pmatrix} -\lambda(t) & 0 & \omega \\ \lambda(t) & -1 & 0 \\ 0 & +1 & -\omega \end{pmatrix}$ .

364 Thus, (4) holds. We write the system with natural dynamics (10)-(12) as  $\dot{\mathbf{u}} = \mathbf{x}_U + \mathbf{M}(t)\mathbf{u}$ ,  $\dot{\mathbf{v}} =$   
 365  $\mathbf{x}_V + \mathbf{M}(t)\mathbf{v}$ , with  $\mathbf{M}(t) = \begin{pmatrix} -\lambda(t) - \mu & 0 & 0 \\ \lambda(t) & -1 - \mu & 0 \\ 0 & +1 & -\mu \end{pmatrix}$  and  $\mathbf{x}_U^T = (\mu(1 - c), 0, 0) = \frac{1}{\alpha}\mathbf{x}_V^T$ ,  $\mathbf{v}(0) = \alpha\mathbf{u}(0)$

366 for  $\alpha = c\theta_S/(1 - c)$ . Both  $\mathbf{u}(t), \hat{\mathbf{u}}(t) := \alpha^{-1}\mathbf{v}(t)$  solve the initial value problem  $\dot{\mathbf{y}}(t) = \mathbf{F}(t, \mathbf{y}(t)) =$   
 367  $\mathbf{M}(t)\mathbf{y}(t) + \mathbf{x}_U, \mathbf{y}(0) = \mathbf{u}(0)$ . By uniqueness of solutions,  $\mathbf{u}(t) = \hat{\mathbf{u}}(t)$ , and hence (4) still holds.

## 368 A.2 Analytical results for leaky vaccine immunity

369 We modify the SIR model of Section 2.1 to have “leaky” immunity, instead of polarised [16]:

$$\dot{S}_U = -S_U\lambda(t) \quad \dot{S}_V = -S_V\theta_S\lambda(t) \quad (\text{A13})$$

$$\dot{I}_U = S_U\lambda(t) - I_U \quad \dot{I}_V = S_V\theta_S\lambda(t) - I_V \quad (\text{A14})$$

$$S_U(0) = 1 - c \gg I_U(0) \quad S_V(0) = c \gg I_V(0) \quad (\text{A15})$$

370 For  $c = 1$  or  $c = 0$ , (A13)-(A15) become a standard SIR model:  $\dot{S} = -R_0SI$ ,  $\dot{I} = R_0SI - I$ ,  
 371  $S(0) = 1 \gg I(0) > 0$  if  $c = 0$ , and the same but with  $R_0 \rightarrow R_0\theta_S\theta_I$  for  $c = 1$ . We assume  
 372  $R_0\theta_S\theta_I, R_0 > 1$  so that the outbreak grows in both situations. The final sizes are

$$C_U = 1 + \frac{1}{R_0}W(-R_0e^{-R_0}) \quad C_V = 1 + \frac{1}{R_0\theta_S\theta_I}W(-R_0\theta_S\theta_Ie^{-R_0\theta_S\theta_I}) \quad (\text{A16})$$

373 respectively, where  $W$  is the Lambert-W function [21]. From (A16) and (18) we find that the relative  
 374 escape pressure in a fully-vaccinated population under the “leaky” immunity assumption is  $\hat{P}_a(1) :=$

375  $\theta_E C_V / C_U = \theta_S^{-1} \hat{P}_a(1)$ , proportional to the relative escape pressure under polarised immunity. Figures  
376 **S1a, S1c** are hence identical, except for the vertical variables,  $\theta_E$  and  $\theta_S \theta_E$ .

377 For  $c \in (0, 1)$ , from (A13),  $\frac{d}{dt} \log S_V = \theta_S \frac{d}{dt} \log S_U$  and so  $S_V(t) = c(S_U(t)/(1-c))^{\theta_S}$ , which deviates  
378 from (4). However, we can still study the system through  $S_U(t)$  and  $\lambda(t) = R_0(I_S + \theta_I I_V)$ :

$$\dot{S}_U = -S_U \lambda, \quad \dot{\lambda} = R_0[S_U + \theta_S \theta_I S_V] \lambda - \lambda = R_0 \left[ S_U + \theta_S \theta_I \frac{c}{(1-c)^{\theta_S}} S_U^{\theta_S} \right] \lambda - \lambda \quad (\text{A17})$$

379 Using the chain rule and initial conditions (A15),  $d\lambda/dS_U = -R_0 - R_0 S_U^{\theta_S-1} c \theta_S \theta_I / (1-c)^{\theta_S} + 1/S_U$ ,  
380 so  $\lambda(t) = R_0(1-c-S_U) + c \theta_I R_0 [1 - (S_U/(1-c))^{\theta_S}] - \log((1-c)/S_U)$ . Setting  $\lim_{t \rightarrow \infty} \lambda(t) = 0$ ,  
381 (A18) defines  $S_U^\infty = \lim_{t \rightarrow \infty} S_U < 1-c$ , the final size of the unvaccinated susceptible compartment:

$$S_U^\infty = 1-c + \frac{c \theta_I}{(1-c)^{\theta_S}} [(1-c)^{\theta_S} - (S_U^\infty)^{\theta_S}] - \frac{1}{R_0} \log \frac{1-c}{S_U^\infty} \quad (\text{A18})$$

382 The cumulative number of infections in each group are  $C_U(c) = 1-c-S_U^\infty$  and  $C_V(c) = c -$   
383  $\lim_{t \rightarrow \infty} S_V(t) = c \left[ 1 - (S_U^\infty / (1-c))^{\theta_S} \right]$  so, for  $0 < c < 1$ ,

$$P_{a'}(c) = C_U(c) + \theta_E C_V(c) = \left[ 1 - c(1-\theta_E) - S_U^\infty - c \theta_E \left( \frac{S_U^\infty}{1-c} \right)^{\theta_S} \right] \quad (\text{A19})$$

384 and where  $S_U^\infty$  is the unique solution in  $(0, 1-c)$  of (A18) for  $R_e > 1$ . For  $R_e \leq 1$ , we set  $P_{a'} = 0$ .  
385 Figures **S1b, S1d** are the equivalent of Figure 1b for the “leaky” and polarised transient models. The  
386 effect of  $\theta_E$  is qualitatively the same in all models, regardless of vaccination coverage.

387 **S Supplementary Figures**

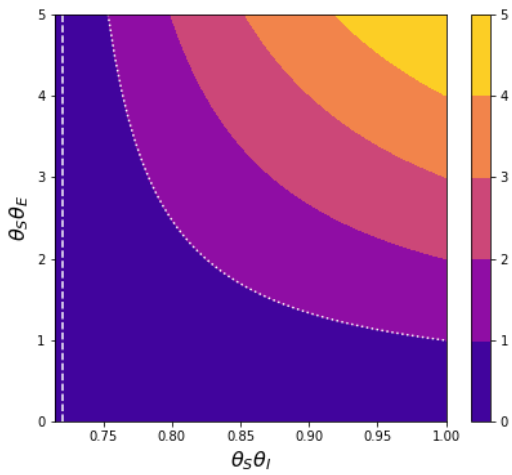

(a) Relative escape pressure  $\hat{P}_\alpha(1)$ .

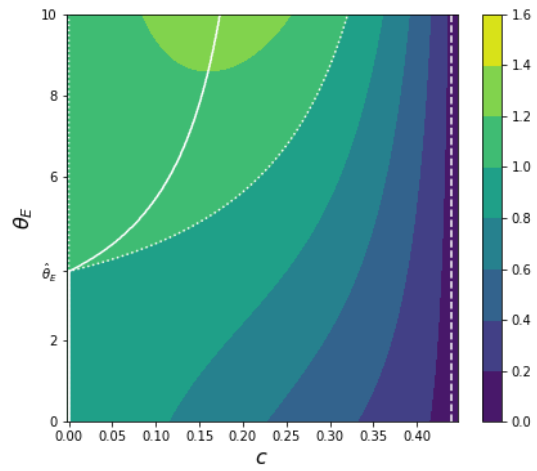

(b) Relative escape pressure  $\hat{P}_\alpha(c)$ .

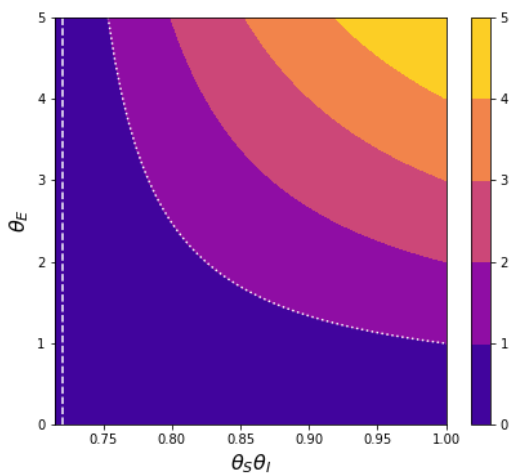

(c) Relative escape pressure  $\hat{P}_{\alpha'}(1)$ .

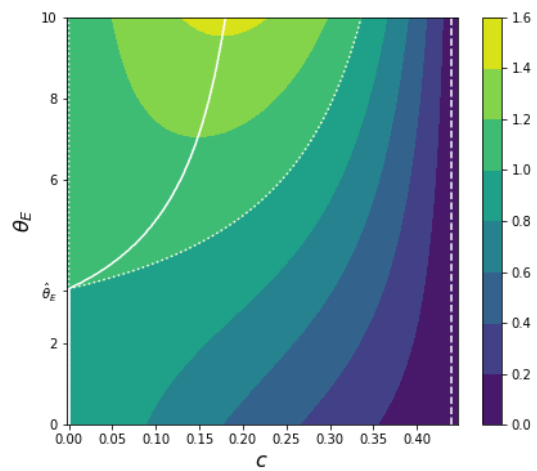

(d) Relative escape pressure  $\hat{P}_{\alpha'}(c)$ .

**Figure S1:** As Figure 1 but for the transient scenario. The qualitative behaviour is the same as in the endemic scenario. Top row is with polarised immunity, bottom row is for leaky immunity. The escape pressure is larger with leaky immunity instead of polarised immunity (as seen in the different variables in the vertical axis of (c) or the maximum values of  $\hat{P}_*$  attained in (d)).

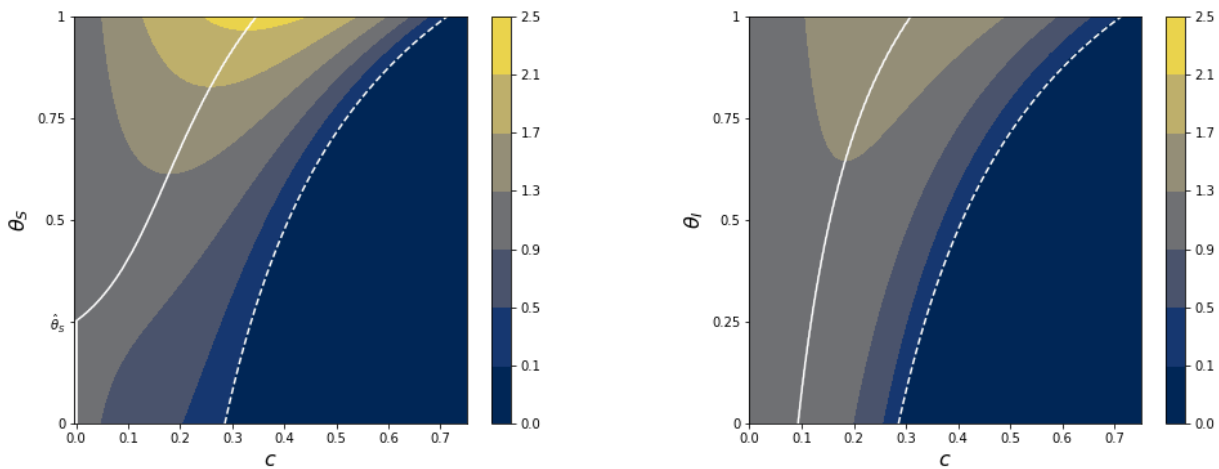

(a) Relative escape pressure  $\hat{P}_a(c)$ .

(b) Relative escape pressure  $\hat{P}_a(c)$ .

**Figure S2:** As Figure 2, but for the transient scenario with polarised immunity. The qualitative behaviour is the same as in the endemic scenario. The same behaviour appears in the transient scenario with leaky immunity (plots not shown).

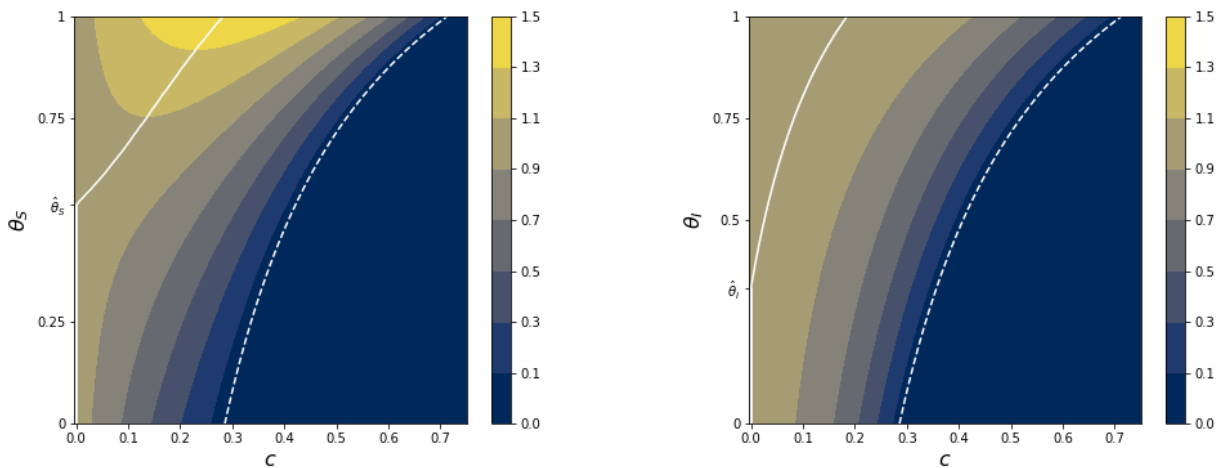

(a) Relative escape pressure  $\hat{P}_b(c)$ .

(b) Relative escape pressure  $\hat{P}_b(c)$ .

**Figure S3:** As Figure 2, but with a lower relative contribution to escape from vaccinated hosts:  $\theta_E = 5$  instead of  $\theta_E = 10$ . Here vaccination that fully blocks infection ( $\theta_S = 0$ ) or onward transmission ( $\theta_I = 0$ ) reduces the escape pressure at any vaccination coverage ( $\hat{P}_b(c) < 1$  for  $c > 0$ ). In other words, here  $\hat{\theta}_I > 0$ . However, the escape pressure is still more sensitive to  $\theta_S$  than  $\theta_I$ . The same behaviour appears in the transient scenario with leaky or polarised immunity (plots not shown).

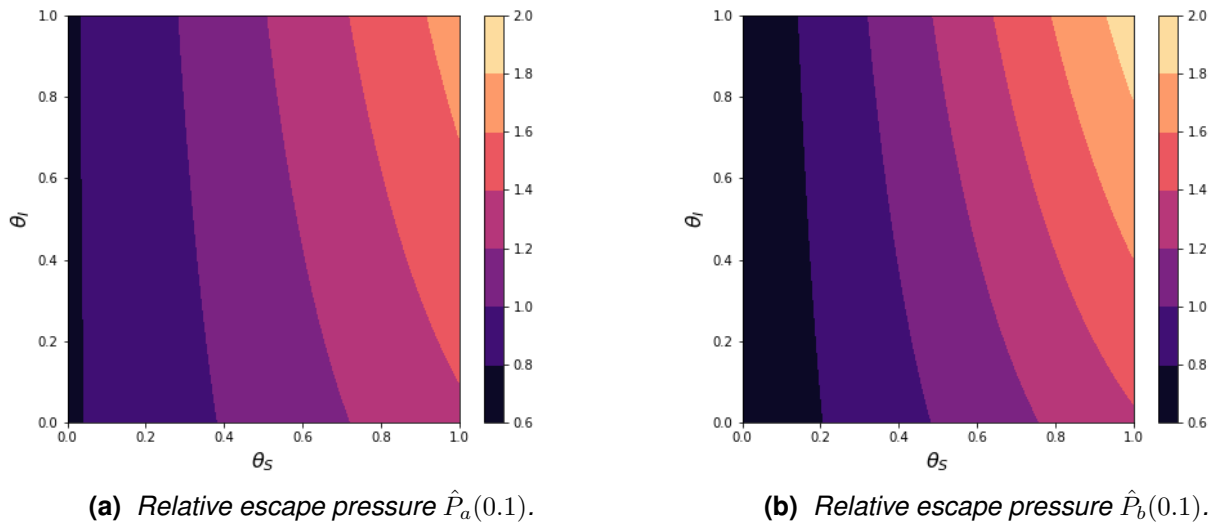

**Figure S4:** Relative escape pressure  $\hat{P}(0.1)$  as a function of the vaccine efficacies  $\theta_S$  and  $\theta_I$  for a fixed vaccination coverage  $c = 0.1$ . (a) is for the transient scenario and (b) is for the endemic scenario: the qualitative results are the same. As expected, reducing  $\theta_S$  or  $\theta_I$  decreases the escape pressure, because this corresponds to more effective vaccines. However, the contour lines that gives constant escape pressures are roughly vertical, meaning that the escape pressure decreases is much more sensitive to  $\theta_S$  than  $\theta_I$ . As in Figures 2, S2,  $R_0 = 1.4$  and  $\theta_E = 10$ . The same behaviour appears in the transient scenario with leaky immunity (plots not shown).

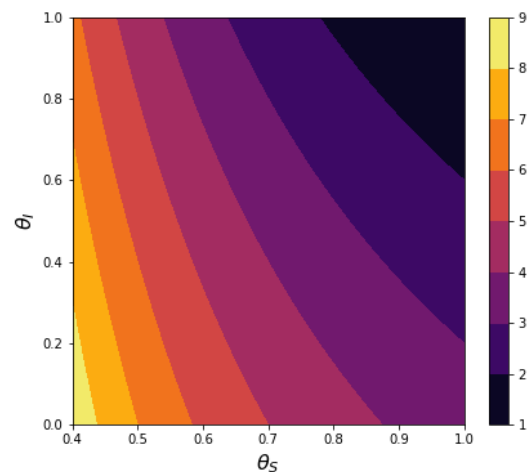

**Figure S5:**  $\hat{\theta}_E$  (the value of the relative contribution to escape from the vaccinated above which intermediate coverages maximise the escape pressure) in the endemic scenario, as given by (19). We only plot values of the susceptibility VE  $\theta_S$  above 0.4, because  $\hat{\theta}_E$  quickly grows without bounds as  $\theta_S \rightarrow 0$  (the vaccines become better at preventing infection). In other words,  $\hat{\theta}_E$  is more sensitive to  $\theta_S$  than  $\theta_I$ , as  $\hat{P}$  (see, e.g., Figure S4).  $R_0 = 1.4$ .



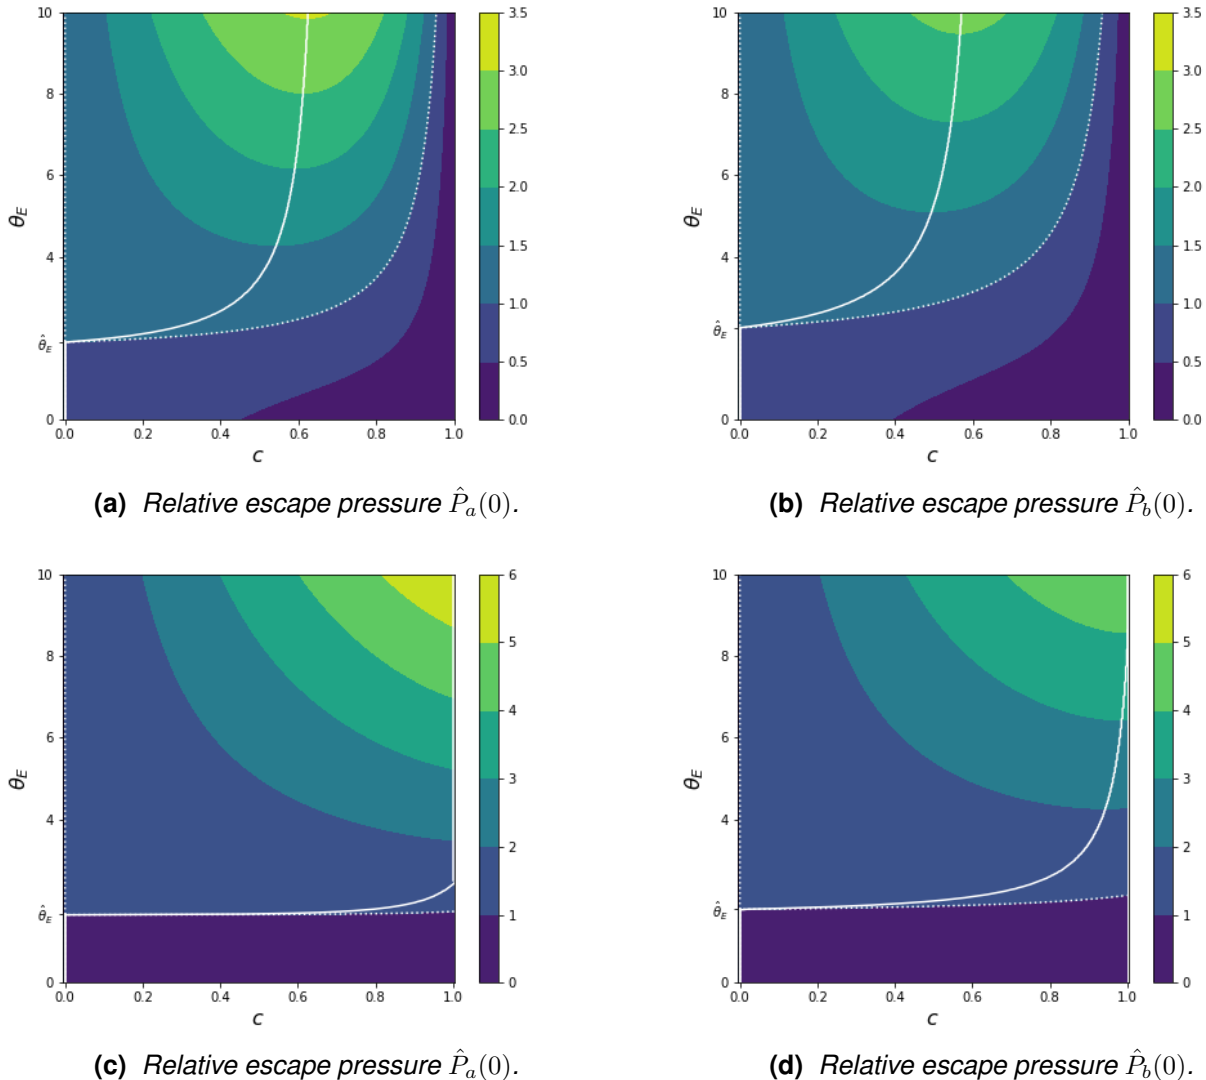

**Figure S6:** As Figures 1b, S1b, but with different  $R_0$  such that vaccination alone cannot achieve herd-immunity ( $\tilde{c} > 1$ ). (a), (b):  $R_0 = 2.8$ . The escape pressure is non-zero even in a fully vaccinated population ( $c = 1$ ), because there is still transmission. Nevertheless, the vaccination coverage that maximises the escape pressure is always less than 1, so the escape pressure does not peak at a fully vaccinated population regardless of how much cases in vaccinated individuals contribute to the escape pressure ( $c_m < 1$ ).  $c_m^\infty < 1$  is the vertical asymptote of the white curve, the limit of  $c_m$  as  $\theta_E \rightarrow \infty$ . (c), (d):  $R_0 = 9$ . For large  $\theta_E$ , the escape pressure increases monotonically with the vaccination coverage  $c$  and is largest at a fully-vaccinated population ( $c = 1$ ). As with the other plots of this paper, the qualitative behaviour of the transient (left column) and endemic (right column) scenarios is the same. We do not show plots for the transient scenario with leaky immunity, but the qualitative behaviour is the same.
